# Supplementary material
Source: ML conference proceedings conference paper supplement (https://openreview.net/forum?id=HjzWIMEWipV)

Frequency

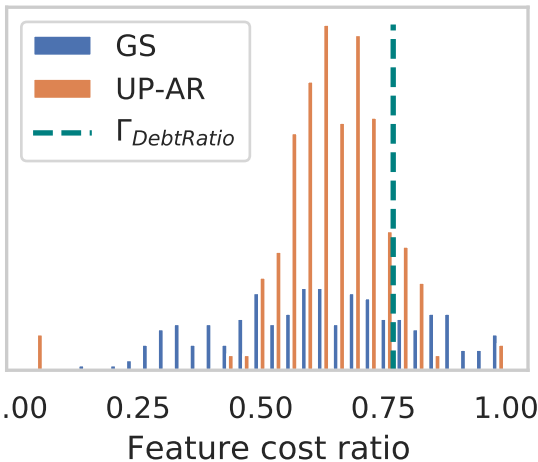

Supplement: supplementary_material [file attachment]

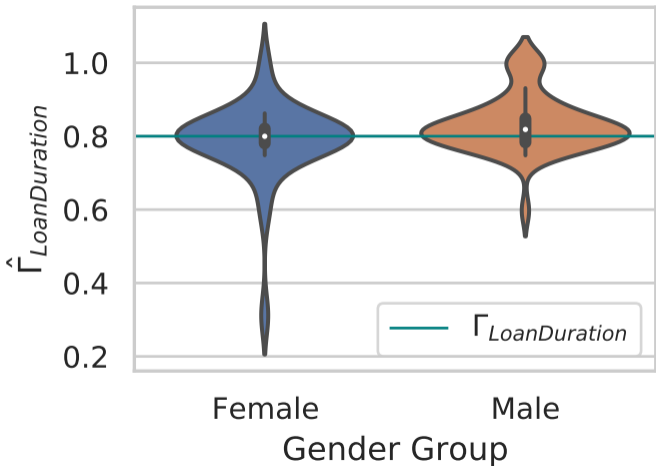

Supplement: supplementary_material [file attachment]

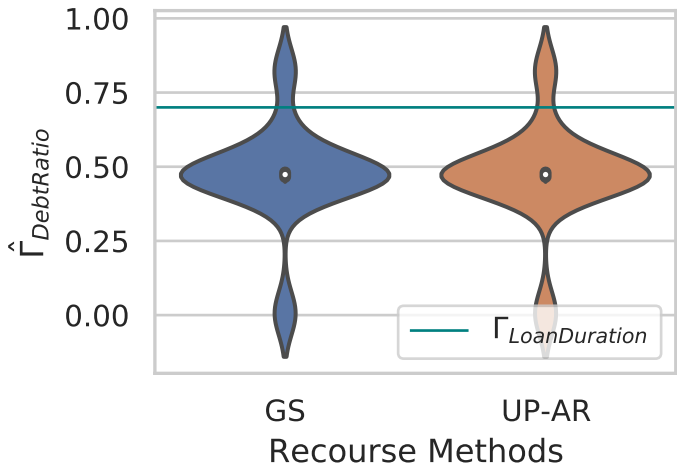

Supplement: supplementary_material [file attachment]

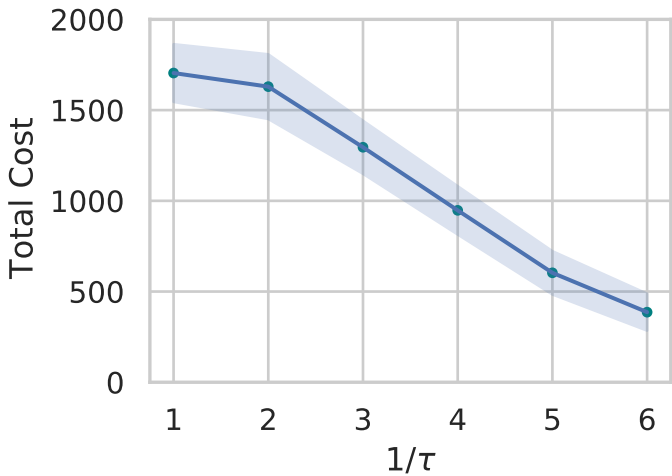

Supplement: supplementary_material [file attachment]

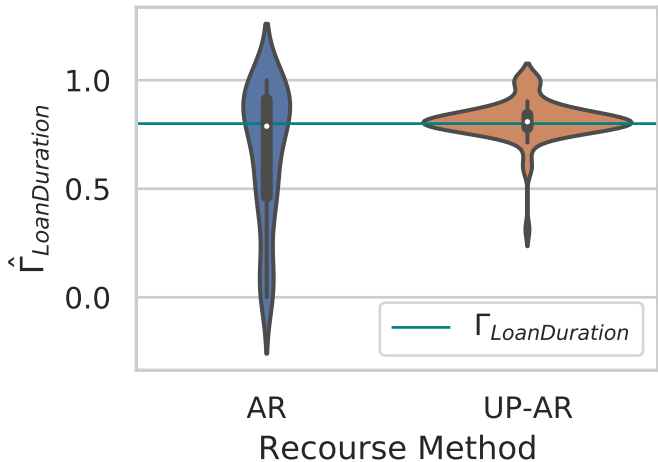

Supplement: supplementary_material [file attachment]

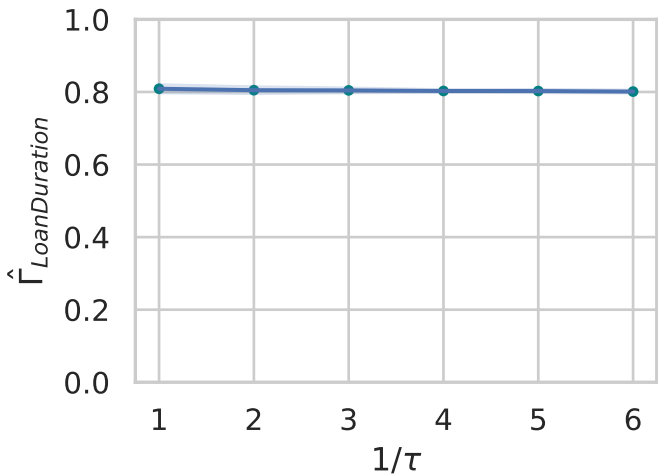

Supplement: supplementary_material [file attachment]

Frequency

125  
100  
75  
50  
25  
0

0

1000

2000

Time (in Milliseconds)

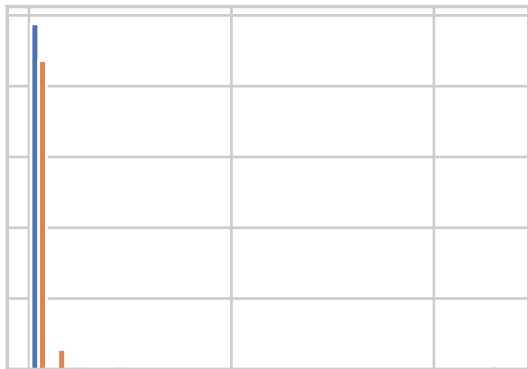

Supplement: supplementary_material [file attachment]

Frequency

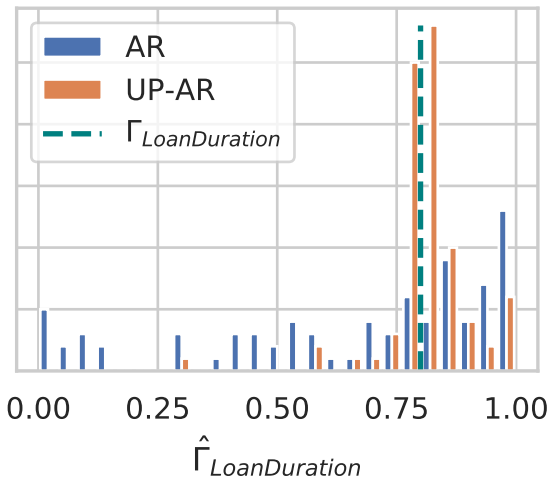

Supplement: supplementary_material [file attachment]

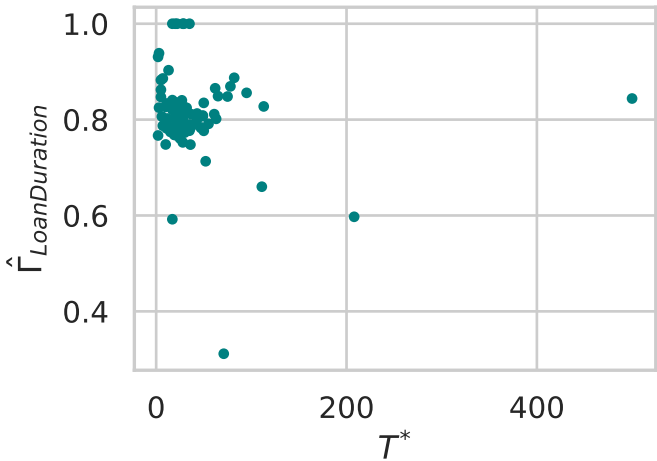

Supplement: supplementary_material [file attachment]

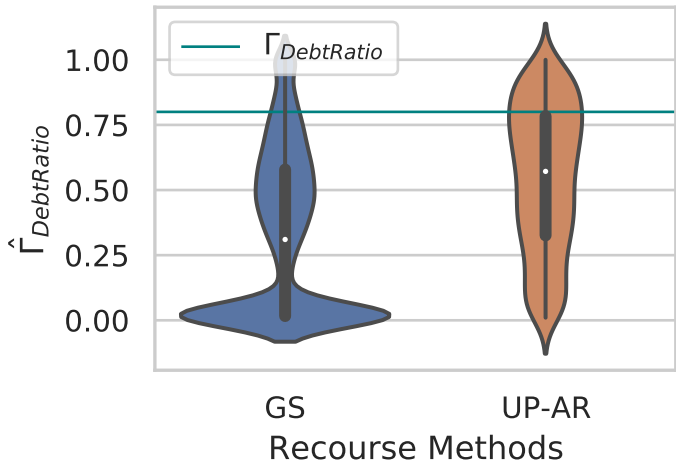

Supplement: supplementary_material [file attachment]

Frequency

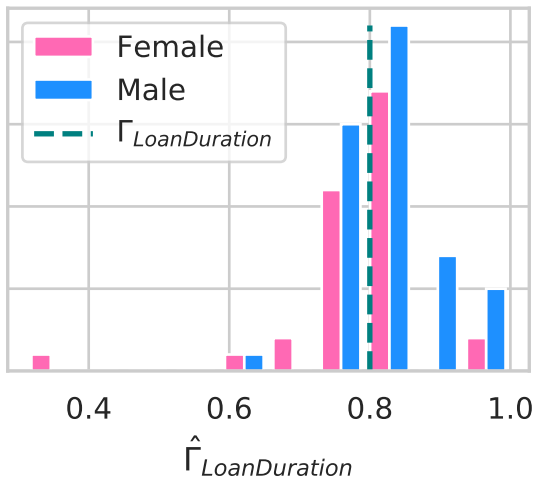

Supplement: supplementary_material [file attachment]

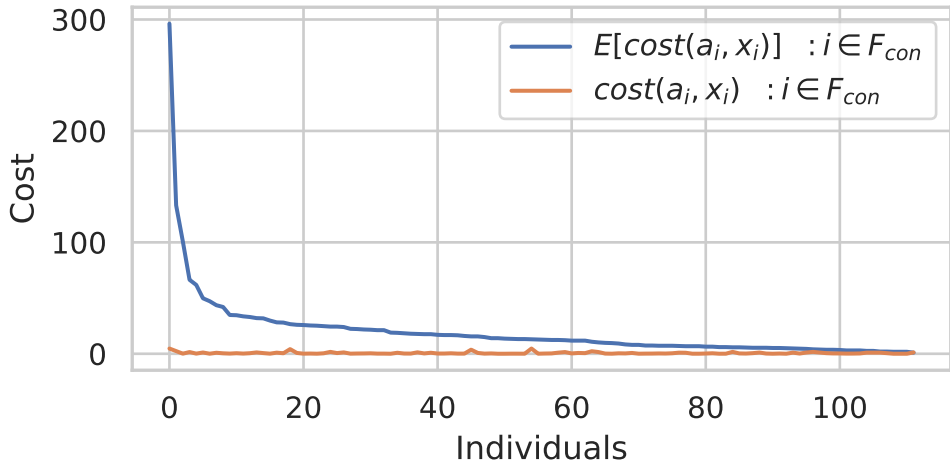

Supplement: supplementary_material [file attachment]

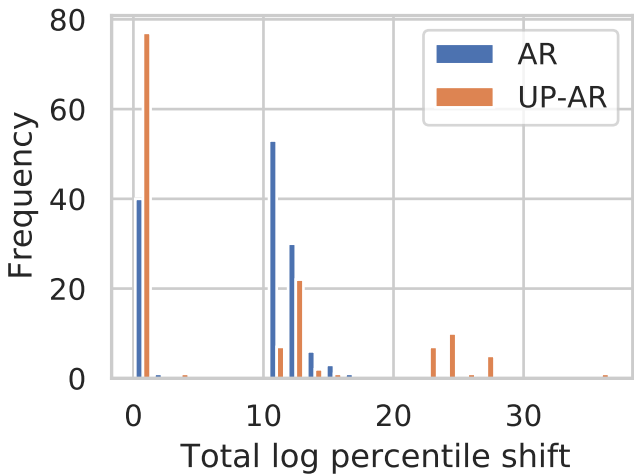

Supplement: supplementary_material [file attachment]
